# Supplementary material
Source: HighWire-hosted journal article supplement (https://diabetes.diabetesjournals.org/content/suppl/2007/07/23/db06-1023)

Chromosome 1

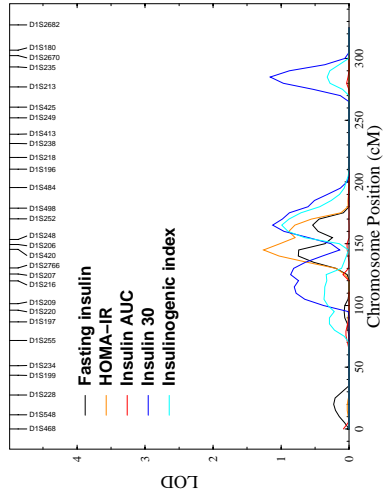

Chromosome 2

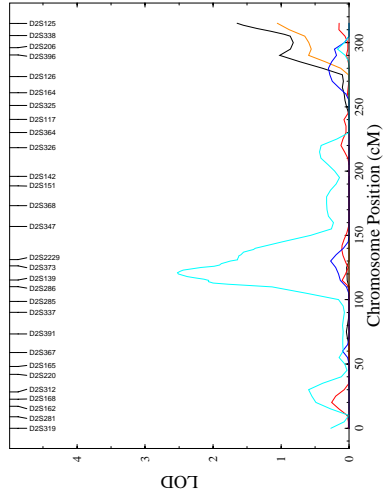

Chromosome 3

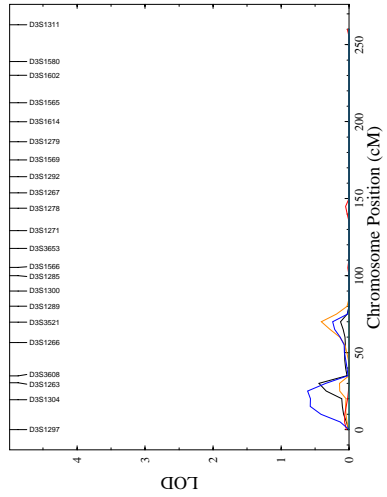

Chromosome 4

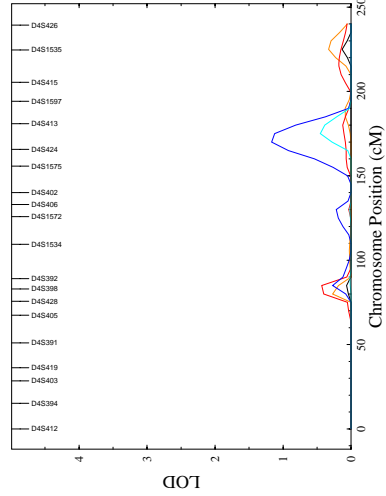

Chromosome 5

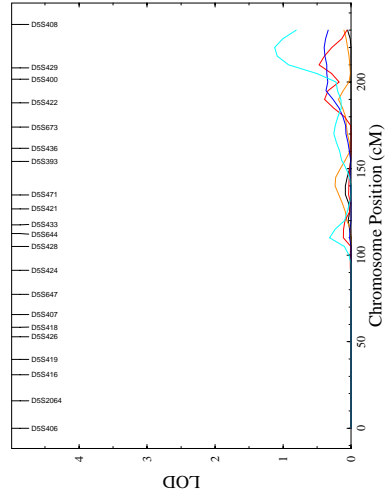

Chromosome 6

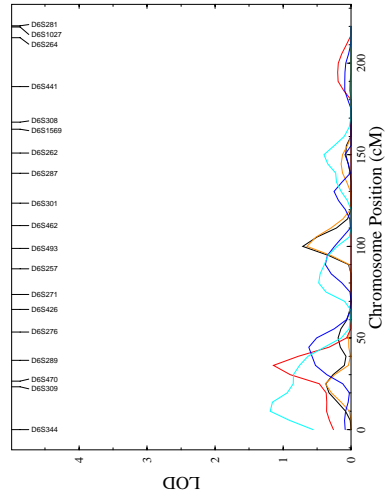

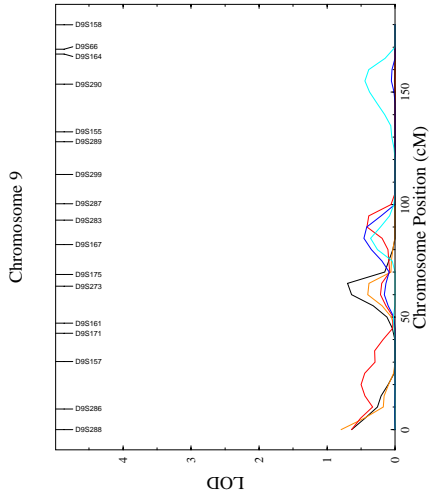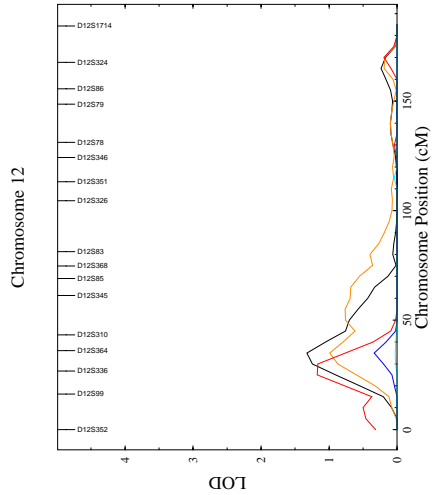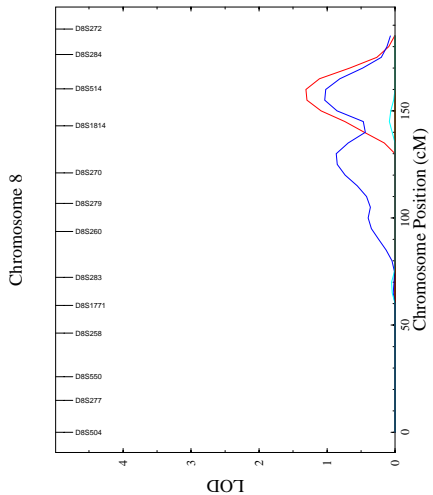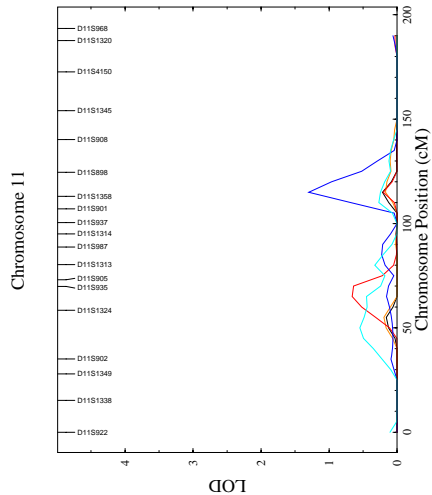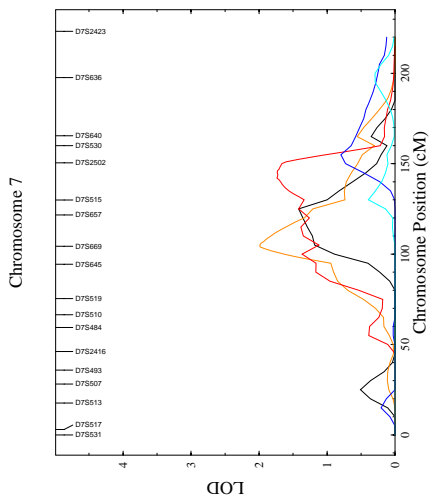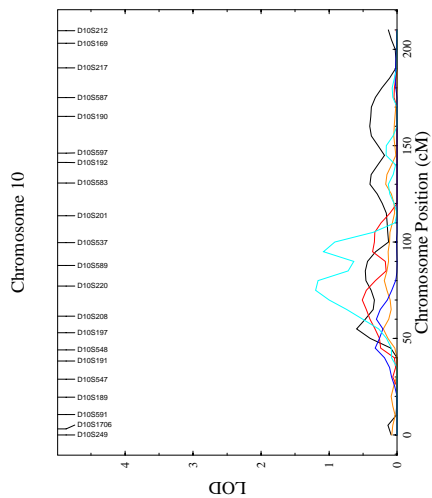

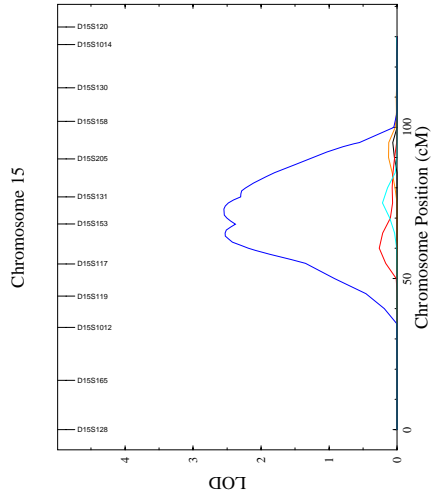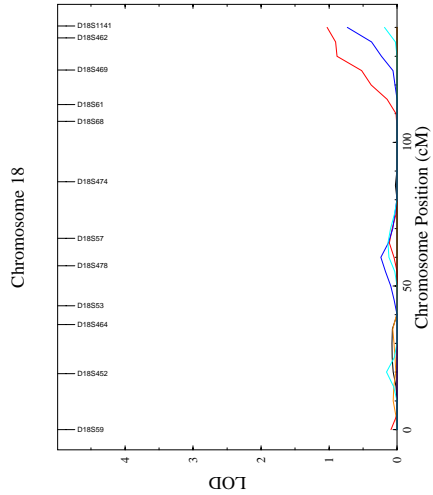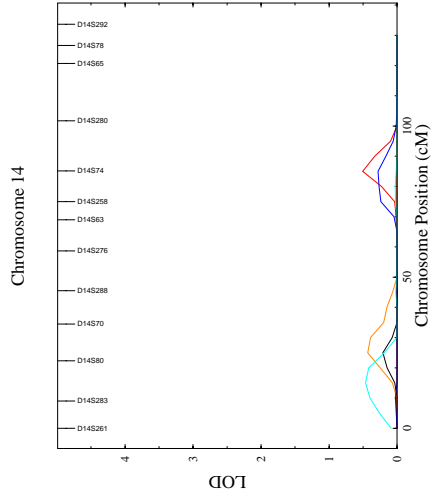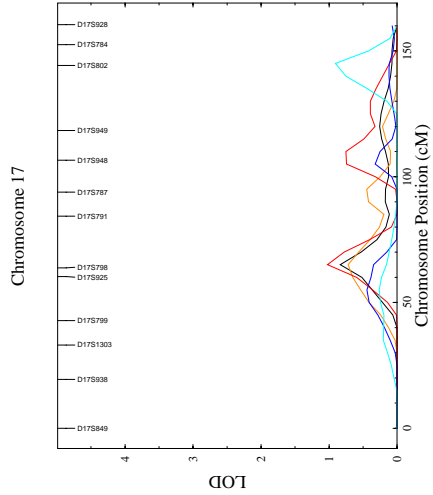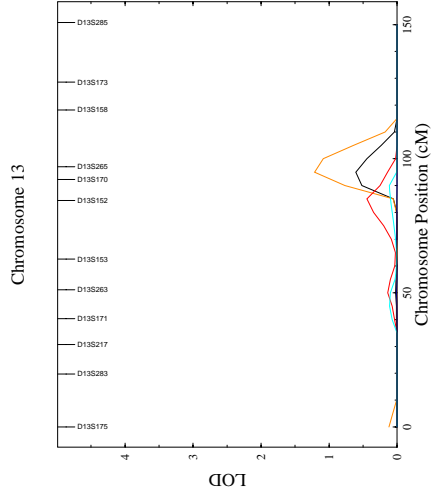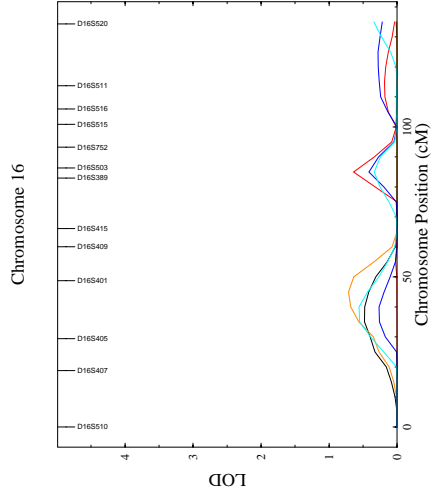

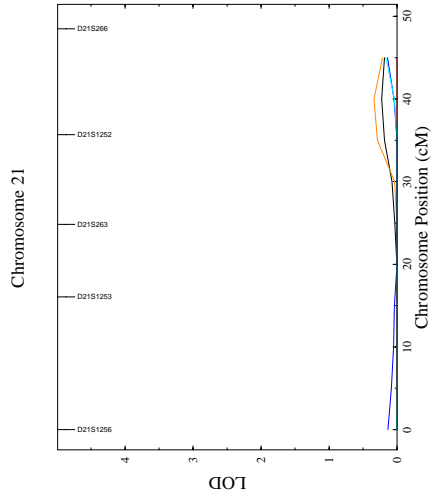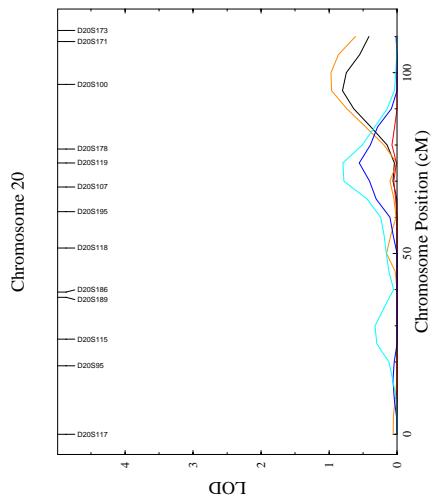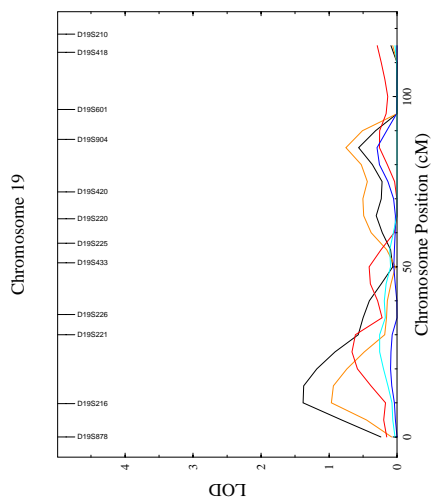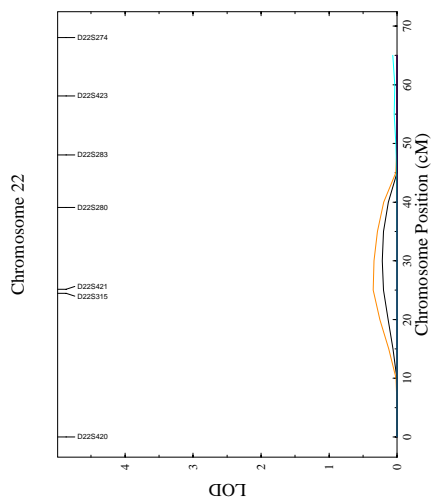

Supplement: db061023supplementaryfigure.pdf [file db061023supplementaryfigure.pdf]
